# Supplementary material for: Macular function measured by Nidek MP-3 microperimeter in normal Chinese individuals across age groups
Source: PeerJ. 2025 Sep 9;13:e19961. doi: 10.7717/peerj.19961 (PMC12428522; doi:10.7717/peerj.19961)
Supplement: Supplemental Information 1 — Data was collected from the MP-3 micropetrmeter. [file peerj-13-19961-s001.xlsx]

## Sheet: sheet3
No.	eye	age	sensitivity	fixation 2	fixation 4	sex	refractive error	BCVA
1	1	21	31.2	98.7	100	1	-3	1
1	2	21	29.4	97.6	98.7	1	-2.5	1
2	1	22	30.6	99.4	99.9	1	-4.25	1
2	2	22	31.1	98.6	99.5	1	-2.75	1
3	1	22	31.3	94.6	99.5	1	-0.5	1
3	2	22	29.9	93.9	96.7	1		1
4	1	23	30.1	90.5	98.6	1	-1.25	1
4	2	23	29	94.7	99.5	1	-1.5	1
5	1	25	30.9	96	98.9	1	0.25	1
5	2	25	31.6	96.5	99.4	1	0.5	1
6	1	26	30.5	99.5	99.9	1	-3	1
6	2	26	28.9	98.3	99.3	1	-2	1
7	1	27	31.5	91.9	98.5	1	-5.5	1
7	2	27	30.7	92.1	94.6	1	-5.25	1
8	1	29	30.2	95.3	99	1		1
8	2	29	30.5	94.4	99.2	1		1
9	1	29	30	86.9	93.6	1		1
9	2	29	31.3	97.1	100	1		1
10	1	29	30.8	99.5	99.9	1	0.25	1
10	2	29	32.1	97.3	100	1		1
11	1	30	31.3	91.7	99.7	1	-1.25	1
11	2	30	29.6	90.4	97.5	1	-1.75	1
12	1	31	31.1	92.1	99.3	1	-2.5	1
12	2	31	31.6	96.7	99.7	1	-2.5	1
13	1	31	31.2	99.7	100	1		1
13	2	31	31.2	99.1	100	1		1
14	1	33	26.1	92.1	98.8	1	0.5	1
14	2	33	30.1	92.8	97.8	1	0.25	1
15	1	33	27.2	90.5	97.5	1	1.25	1
15	2	33	30	99.4	99.7	1	1.5	1
16	1	34	29	99.5	100	1	-3.5	1
16	2	34	29.7	99.9	100	1	-2.25	1
17	1	35	30	83.8	94.5	1		1
17	2	35	31.2	94.1	99	1		1
18	1	36	30.7	98.4	99.5	1	-1	1
18	2	36	29.6	99.9	100	1	-1.25	1
19	1	37	32	93.3	99	1	0.75	1
19	2	37	29.8	99.7	100	1	0.75	1
20	1	37	30.6	97.4	98.8	1		1
20	2	37	32.1	99.3	100	1		1
21	1	39	31.4	84.6	99.2	1		1
21	2	39	30	99.2	100	1		1
22	1	41	28.3	96.1	99.4	1	1.25	1
22	2	41	29.4	99	100	1	0.75	1
23	1	42	30.1	82.3	88.3	1	-1.25	1
23	2	42	29.5	82.3	93.9	1	-1.75	1
24	1	44	31.4	78.3	97.6	1	-0.5	1
24	2	44	30.2	97.1	99.2	1	-0.25	1
25	1	46	30.9	96.4	99.4	1		1
25	2	46	30	98.7	99.8	1		1
26	1	48	30.6	74.3	99.4	1	0.75	1
26	2	48	30.3	92.7	99.8	1	0.5	1
27	1	49	30	60.7	83.4	1	-4.25	1
27	2	49	28.6	93.5	99.8	1	-5.25	1
28	1	50	30.9	90.6	99.3	1		1
28	2	50	30.7	89.6	98.1	1	0.25	1
29	1	52	30.7	98.2	99.9	1	-3.25	1
29	2	52	28.2	91.8	98.6	1	-3.5	1
30	1	54	31.2	93.2	99.3	1	1.25	1
30	2	54	29.5	93.1	98.9	1	1.25	1
31	1	54	28.9	98	99.9	1	-2.25	1
31	2	54	29	91.9	100	1	-2.5	1
32	1	56	30.1	90.4	98.1	1	-1.75	1
32	2	56	27.6	76.9	98.8	1	-0.5	1
33	1	58	29.6	76	95.9	1	2.5	1
33	2	58	30.9	99.8	100	1	1.5	1
34	1	58	29.8	92.6	99.2	1		1
34	2	58	27.8	96.1	99.3	1	0.25	1
35	1	59	28.9	97.3	99.2	1	0.75	1
35	2	59	29.1	99.1	100	1	0.25	1
36	1	61	28.5	90.3	99	1	-4.5	1
36	2	61	27.6	97.8	99.8	1	-5.5	1
37	1	62	28.8	93.2	97.5	1	-0.25	1
37	2	62	29.3	87.3	98.3	1	-0.5	1
38	1	62	27.9	79.3	89.5	1	-1.75	1
38	2	62	28.4	96.5	99.9	1	-1.5	1
39	1	62	28.6	92.7	96.6	1	1.25	1
39	2	62	29.1	99.8	100	1	0.75	1
40	1	67	27.9	90.2	98.1	1	2.25	1
40	2	67	28.7	88.4	99.6	1	2	1
41	1	67	28.7	87.4	98.2	1	0.25	1
41	2	67	28.6	100	100	1	0.25	1
42	1	68	26.3	90.3	95.2	1		1
42	2	68	30.4	94.1	98.8	1		1
43	1	68	27.8	98.9	99.2	1	-0.25	1
43	2	68	30.1	99.2	100	1	-0.5	1
44	1	72	30.1	90.6	98.3	1	1.25	1
44	2	72	29.2	92.6	98.4	1	1.25	1
45	1	72	28.7	94.5	99.9	1	-0.75	1
45	2	72	26.9	93.2	98.7	1	-0.5	1
46	1	75	26.2	96.8	99.5	1	-0.25	1
46	2	75	27	94.3	97.7	1	-0.75	1
47	1	78	27.6	97.3	99.2	1	-1.25	1
47	2	78	25.6	90.5	94.2	1	-1.25	1
48	1	21	30.4	99.1	99.9	2	1	1
48	2	21	31.2	99.4	100	2	1.25	1
49	1	21	31	99	99.8	2	1.25	1
49	2	21	30.2	99.1	100	2	1.75	1
50	1	21	28.1	93.2	97.7	2		1
50	2	21	27.2	99	99.7	2	-0.25	1
51	1	23	29.2	96.7	98.6	2	-0.75	1
51	2	23	29.8	91.3	97	2	-0.5	1
52	1	24	30.6	99	100	2	-1.25	1
52	2	24	30.3	96.9	99.9	2	-1	1
53	1	25	32.3	99.8	100	2	0.75	1
53	2	25	32	99.9	100	2	0.75	1
54	1	26	29.7	99.1	99.9	2	0.25	1
54	2	26	31.2	97.5	99.8	2	-0.25	1
55	1	27	31.4	87.7	97.4	2	0.5	1
55	2	27	30.5	91.5	97.6	2	0.5	1
56	1	27	29.2	97.6	98.6	2	-1	1
56	2	27	29.8	80.9	96.9	2	-0.5	1
57	1	28	31.2	91.9	97.7	2	-0.25	1
57	2	28	30.6	92.5	98.6	2		1
58	1	30	31	96.6	99.4	2	0.25	1
58	2	30	30.9	88.1	98.9	2	0.5	1
59	1	31	28.8	95.5	99.1	2	-0.25	1
59	2	31	31.5	99.8	100	2	-0.25	1
60	1	31	29.5	99.1	99.9	2	0.5	1
60	2	31	31	99.2	100	2	1	1
61	1	31	31.2	99.2	100	2	1.25	1
61	2	31	30.9	97.9	99.8	2	1	1
62	1	32	29.3	96.8	99.6	2	0.25	1
62	2	32	31.4	83.6	99.3	2	0.25	1
63	1	33	29.8	99.1	99.8	2		1
63	2	33	30.5	87.5	96.3	2		1
64	1	34	29.4	99.2	99.7	2	0.5	1
64	2	34	31.5	99	100	2		1
65	1	34	29.5	96	98.6	2	-1.25	1
65	2	34	29.1	86.4	97.1	2	-0.5	1
66	1	36	30.9	98.3	99	2		1
66	2	36	31.2	94.3	99.2	2		1
67	1	36	31.6	93.2	96.5	2		1
67	2	36	31.2	67.9	96.5	2		1
68	1	38	30.3	94.2	97.4	2	0.25	1
68	2	38	29.7	90.2	98.9	2	0.5	1
69	1	41	31.4	99	100	2	-0.5	1
69	2	41	29.4	90.2	98.7	2	-3.5	1
70	1	42	31.3	99.7	100	2	-1.25	0.8
70	2	42	30.9	99.3	99.8	2	-1	1
71	1	43	28.6	99.2	99.8	2	0.25	1
71	2	43	27.2	90.3	99.6	2	0.5	1
72	1	46	29.3	93.1	99.3	2	0.5	1
72	2	46	30.2	99.4	99.2	2	0.25	1
73	1	48	29.8	97.3	99	2	-0.75	0.8
73	2	48	31.2	99.2	100	2	-0.75	0.8
74	1	51	29.3	98.2	99.2	2	1.25	1
74	2	51	29.3	90.1	96.3	2	1.75	1
75	1	51	30.6	77.5	92	2	0.25	1
75	2	51	30.9	77.8	88.5	2	0.75	1
76	1	51	28.3	93.2	97.8	2	-0.75	0.8
76	2	51	28.1	80.3	98.2	2	-1.25	1
77	1	55	29.7	88.2	93.7	2	-1.25	1
77	2	55	30.8	95.9	99.8	2	-1.5	1
78	1	55	30.7	94.6	99.7	2	1.25	1
78	2	55	29.2	93.2	97.8	2	1.5	1
79	1	57	26.9	60.3	82.1	2	1.5	1
79	2	57	27.4	99.2	100	2	1.75	1
80	1	57	30.2	92.1	98.8	2	-0.25	0.8
80	2	57	29.6	100	100	2	-1.75	0.8
81	1	58	30.1	92.6	100	2	-3.25	1
81	2	58	29.2	90.2	98.9	2	-2.25	1
82	1	61	27.6	93.6	99.8	2	0.25	1
82	2	61	28.7	99.5	100	2	0.75	1
83	1	63	28	85.4	96.1	2	1.25	1
83	2	63	31.2	99.1	100	2	0.75	1
84	1	64	27.2	99.4	99.8	2	-0.25	1
84	2	64	28.8	93.2	95.6	2	-0.25	1
85	1	64	26.2	98.1	99.9	2		0.8
85	2	64	29.7	83.2	98	2	0.5	1
86	1	69	26.3	92.3	99.1	2	0.25	1
86	2	69	27.9	98.3	99.9	2	1.25	1
87	1	72	26.3	85.3	99.2	2	1.25	0.8
87	2	72	28.2	95.4	100	2	1.5	0.8
88	1	73	27.5	99.6	100	2	1.75	1
88	2	73	25.2	80.4	90.3	2	-0.25	1
89	1	74	24.9	76.3	97.8	2		0.8
89	2	74	27.3	89.7	99.7	2	-0.5	1
90	1	77	25.9	87.5	90.2	2	-0.25	1
90	2	77	25.3	76.3	92.3	2	-0.75	1
91	1	82	25.9	99.2	99.3	2	1	0.8
91	2	82	25.2	63.5	91.9	2	0.5	0.8
